# Supplementary material
Source: publisher site journal article supplement (https://www.dovepress.com/article/603127)
Supplement: Supplementary file 1 [file 603127%20Supplementary%20Material.doc]

# Supplementary Material 1

**Supplementary Material 1: Literature Search Strategy and PRISMA Flow Diagram**

In this study, a systematic literature search was conducted across the PubMed, Web of Science, Embase, CNKI, and Cochrane Library databases, spanning from January 2000 to April 2026, in accordance with a pre-established search strategy. The search terms were formulated around keywords related to the disease, interventions, and mechanisms, and were adapted to the specific syntax rules of each database: ("Heart Failure" OR "Cardiac Failure" OR "Heart Dysfunction") AND ("Neutrophil Extracellular Traps" OR "NETs" OR "NETosis") AND ("Sterile Inflammation" OR "Immunothrombosis" OR "Cardiac Remodeling" OR "Therapeutic Targets" OR "Intervention" OR "Comorbidities" OR "Multisystem"). The literature screening process was performed independently by two researchers in a double-blind (back-to-back) manner to ensure consistency and minimize selection bias; any discrepancies were resolved through consensus-reaching discussions or by consulting a third senior researcher.

The inclusion criteria were as follows: (1) Study subject: investigating the role of neutrophil extracellular traps (NETs) in heart failure and its systemic/multisystemic comorbidities; (2) Mechanistic indicators: the research report must contain at least one indicator related to the pathophysiological mechanisms of NETs; (3) Interventions: involving potential therapeutic interventions targeting NETs; (4) Study design: including *in vitro* cellular assays, *in vivo* animal models, and clinical trials or clinical observational studies; (5) Language restrictions: no strict language restrictions.

The exclusion criteria included conference abstracts/proceedings, case reports, studies with incomplete information or from which key data could not be extracted, empirical reports, editorials, and posters. The screening process strictly adhered to the PRISMA reporting guidelines and is presented in a PRISMA flow diagram.

**Screening**

**Included**

**Identification**

Records

identifiedfrom:

Pubmed: 105

Web of Science: 81

Embase: 28

CNKI: 15

Cochrane Library: 11

Databases (n=240)

Records after

duplicatesremoved

(n=196)

Records screened
(n =196 )

Records excluded based on title and abstract

(n = 51 )

Reports sought for retrieval(n = 145 )

Reports not retrieved:
(n = 2 )

Reports assessed for eligibility (n=143)

Reports excluded (n=39): Conference abstracts/case reports (n=12)

Data incomplete/inaccessible (n=6)

Insufficient mechanism depth (n=21)

Inclusion of literature (n=104)
